# Supplementary material for: Activation of the CaMKII-Sarm1-ASK1-p38 MAP kinase pathway protects against axon degeneration caused by loss of mitochondria
Source: eLife. 2022 Mar 14;11:e73557. doi: 10.7554/eLife.73557 (PMC8920508; doi:10.7554/eLife.73557)
Supplement: Figure 1—figure supplement 1—source data 1. [file elife-73557-fig1-figsupp1-data1.xlsx]

## Sheet: Figure 1-figure supplement 1A
Genotype	Animals with two intact axons	Animals with degeneration	Total number of animals	Fraction of animals with two intact axons
Control	28	0	28	1
ric-7(n2657)	0	26	26	0
unc-116(rh24sb79)	0	21	21	0
miro-1(wy50266); mtx-2(wy50180)	0	45	45	0
trak-1(gk571211)	39	0	39	1
miro-1(tm1966); miro-2(tm2933)	48	2	50	0.96

## Sheet: Figure 1-figure supplement 1B
Mito density(#/100μm)
WT	miro-1; mtx-2	miro-1; miro-2
5.40541	0	4.41176
4.58015	0	6.36943
3.4375	0	5.27778
2.63158	0	3.64146
5.47945	0	4.6875
3.2	0	4.46735
5.22088	0.584795	4.947
7.12251	0	5.625
4.8913	0	3.75
3.94737	0	3.56164
4.80769	0	5.28302
4.67836	0	6.07477
6.66667	0	5
9.12698	0	5.08475
4.89511	0	5.52326
4.6083	0	1.55763
7.04225	0	1.97183
4.09357	0	5.03356
6.5	0	6.62983
7.74648	0	4.61538
6.27063	0	7.25807
4.98534	0	3.14136
3.55556		6.60377
8		3.003
3.33333		4.02299
5.38462		5.15151
4.54545		4.95356
		4.375
		4.25532
		4.97238

## Sheet: Figure 1-figure supplement 1D
Genotype	Animals with two intact axons	Animals with degeneration	Total number of animals	Fraction of animals with two intact axons
Control	27	0	27	1
ric-7(n2657)	1	56	57	0.0175439
ric-7(n2657) + Chimera	54	2	56	0.964286
