# Supplementary material for: Activation of the CaMKII-Sarm1-ASK1-p38 MAP kinase pathway protects against axon degeneration caused by loss of mitochondria
Source: eLife. 2022 Mar 14;11:e73557. doi: 10.7554/eLife.73557 (PMC8920508; doi:10.7554/eLife.73557)
Supplement: Figure 1—figure supplement 2—source data 1. [file elife-73557-fig1-figsupp2-data1.xlsx]

## Sheet: Figure 1-figure supplement 2B
Genotype	Animals with two intact axons	Animals with degeneration	Total number of animals	Fraction of animals with two intact axons
Control	19	0	19	1
ric-7(n2657)	0	24	24	0
ric-7(n2657); casy-1(wp60)	0	30	30	0
ric-7(n2657); unc-43(wp64)	2	19	21	0.0952381
