# Supplementary material for: Activation of the CaMKII-Sarm1-ASK1-p38 MAP kinase pathway protects against axon degeneration caused by loss of mitochondria
Source: eLife. 2022 Mar 14;11:e73557. doi: 10.7554/eLife.73557 (PMC8920508; doi:10.7554/eLife.73557)
Supplement: Figure 1—figure supplement 3—source data 1. [file elife-73557-fig1-figsupp3-data1.xlsx]

## Sheet: Figure 1-figure supplement 3
Genotype	Age	Animals with two intact axons	Animals with degeneration	Total number of animals	Fraction of animals with two intact axons
miro-1(wy50180); mtx-2(wy50266)	L4	22	19	41	0.536585
	1doa	1	34	35	0.0285714
	2doa	0	39	39	0
	3doa	0	45	45	0
miro-1(wy50180); mtx-2(wy50266); casy-1(wp78)	L4	36	1	37	0.972973
	1doa	20	2	22	0.909091
	2doa	28	1	29	0.965517
	3doa	29	6	35	0.828571
miro-1(wy50180); mtx-2(wy50266); unc-43(n498sd)	L4	38	2	40	0.95
	1doa	35	0	35	1
	2doa	38	5	43	0.883721
	3doa	34	4	38	0.894737
