# Supplementary material for: Activation of the CaMKII-Sarm1-ASK1-p38 MAP kinase pathway protects against axon degeneration caused by loss of mitochondria
Source: eLife. 2022 Mar 14;11:e73557. doi: 10.7554/eLife.73557 (PMC8920508; doi:10.7554/eLife.73557)
Supplement: Figure 1—source data 1. [file elife-73557-fig1-data1.xlsx]

## Sheet: Figure 1B
Genotype	Animals with two intact axons	Animals with degeneration	Total number of animals	Fraction of animals with two intact axons
Control	110	1	111	0.990991
ric-7	0	114	114	0
ric-7; suppressor mutant1	85	4	89	0.955056
ric-7; suppressor mutant2	98	6	104	0.942308
ric-7; suppressor mutant3	89	6	95	0.936842
ric-7; suppressor mutant4	92	7	99	0.929293
ric-7; suppressor mutant5	66	8	74	0.891892
ric-7; suppressor mutant6	87	16	103	0.84466
ric-7; suppressor mutant7	85	16	101	0.841584
ric-7; suppressor mutant8	70	24	94	0.744681
ric-7; suppressor mutant9	72	25	97	0.742268
ric-7; suppressor mutant10	97	45	142	0.683099
ric-7; suppressor mutant11	53	35	88	0.602273

## Sheet: 1D
Genotype	Age	Animals with two intact axons	Animals with degeneration	Total number of animals	Fraction of animals with two intact axons
Control	L3	45	0	45	1
	L4	60	0	60	1
	1doa	64	0	64	1
	2doa	74	0	74	1
	3doa	54	0	54	1
	4doa	48	0	48	1
	5doa	64	0	64	1
ric-7(n2657)	L3	49	0	49	1
	L4	47	18	65	0.723077
	1doa	0	63	63	0
	2doa	0	68	68	0
	3doa	0	54	54	0
	4doa	0	49	49	0
	5doa	0	59	59	0
ric-7(n2657); casy-1(wp60)	L3	44	0	44	1
	L4	52	0	52	1
	1doa	57	1	58	0.982759
	2doa	50	3	53	0.943396
	3doa	44	4	48	0.916667
	4doa	45	6	51	0.882353
	5doa	28	7	35	0.8
ric-7(n2657); unc-43(wp64)	L3	44	2	46	0.956522
	L4	50	4	54	0.925926
	1doa	55	2	57	0.964912
	2doa	45	1	46	0.978261
	3doa	43	3	46	0.934783
	4doa	54	4	58	0.931034
	5doa	47	5	52	0.903846

## Sheet: 1F and 1G
Mito density(#/100micron)
L1					L4
WT	ric-7(n2657)	ric-7(n2657); casy1(wp60)	ric-7(n2657); unc-43(wp64)		WT	ric-7(n2657)	ric-7(n2657); casy1(wp60)	ric-7(n2657); unc-43(wp64)
3.6121	0.318331	0	0		6.20789	1.1187	2.26161	0
5.10306	0	0	0		7.36095	0	1.58971	0
3.99948	0	0	0.746123		0	0	0	0.3312
2.4423	0	1.46012	0		3.44742	0.348529	5.02953	0
2.69433	0	0	0		4.75239	1.50229	0	0
3.18406	0	0	1.82985		7.5698	0.698667	0	0
5.95479	0	0.523359	0		3.04392	0	0	0
5.28838	0.497833	0	1.55442		7.6512	0	0	0.444278
4.87228	0.338726	0	0		4.95789	0	0	0.945929
5.33755	0	0	0		8.14117	0	0	0
4.91619	0	0	0		7.32668	1.00683	0	0
5.02283	0	0.498233	0		5.46249	0	0	0
4.99238	0.411514	0	0		2.037	0	0	0
5.06384	0	0	0		4.06735	0	0	0.32272
3.74489	0.440776	1.32169	0		2.19598	0.298685	0	0.596064
5.46855	0	0.725949	0		3.26695	0	0.530907	0
	0	0	0		6.66545	0	1.57776	0
	0	0.792099	6.56229		6.33993	0	0	0
	0.946541	0	0		3.2631	1.54867	0	0
	0	4.99546	0		3.77082	0	1.56954	0
	0	0	2.68803		3.67464	0	0	0.628481
	0	0	0.761915		0	0	0	0
	0.972181	0	0		8.58518	0	0	0
	0	0	0.951031		4.4129	0	3.60665	1.1331
	0	0	0		6.40536	0	3.35148	0
	0.453992	0	0		6.78994	0	0.493529	0
		1.62924	0		7.47967	0	0	0
		0.488039	0		5.14183	0	0	0
		0	0		4.15216	0	0	0
		3.95361	0		0	1.13771	0.894151	0.885226
		0	0		2.99695	0	0	0
		0	0		1.95634	0	2.7827	0
		0	0.620384		3.01944	0	5.69489	0
		0	0		9.18344	0	1.04424	0.308217
		0	0		1.64762	2.58994	0	0.995804
		0	0		3.95598	0	0	0
		0	0		4.44703	0	0	0
		0	0		4.13199	0	0.809269	0
		0	0		5.96161	1.72094	0	0
		0	0		6.18286	1.17659	0	0
		0	0.537732		0.738275	0	0.631203	0
		0	0		1.53279	0	0	0.93485
		0	0		5.31421	0.375232	0.898839	0
		1.53721	0		4.48791	1.18895	0.634584	0
		0	0		5.84256	0.885146	0.888511	0
		0	0		2.10791	0	0.58461	0.392467
		0.343461	0		3.11207	0	1.13015	0
		0	2.5543		3.10063	0	2.21745	0
		0	0		2.84186	0	0.719178	0
		0	0		3.00851	0.968674	0	0
		0	0		4.07495	0		0
		0.605548	0		3.98232	0		0
		0	0		3.61173			0
		0			4.08043			0
		0						0
		1.84578						0
		0						0
		0						0
		0						0
		0						0
		0						0
		0						0
		0						0
								0
								0
								0
								0
								0
								0.364451
								0
