# Supplementary material for: Activation of the CaMKII-Sarm1-ASK1-p38 MAP kinase pathway protects against axon degeneration caused by loss of mitochondria
Source: eLife. 2022 Mar 14;11:e73557. doi: 10.7554/eLife.73557 (PMC8920508; doi:10.7554/eLife.73557)
Supplement: Figure 2—figure supplement 1—source data 1. [file elife-73557-fig2-figsupp1-data1.xlsx]

## Sheet: Figure 2-figure supplement 1
Genotype	Animals with two intact axons	Animals with degeneration	Total number of animals	Fraction of animals with two intact axons
ric-7(n2657)	0	36	36	0
ric-7(n2657); casy-1(syb3311[casy-1::gfp11x7])	0	62	62	0
