# Supplementary material for: Activation of the CaMKII-Sarm1-ASK1-p38 MAP kinase pathway protects against axon degeneration caused by loss of mitochondria
Source: eLife. 2022 Mar 14;11:e73557. doi: 10.7554/eLife.73557 (PMC8920508; doi:10.7554/eLife.73557)
Supplement: Figure 2—source data 1. [file elife-73557-fig2-data1.xlsx]

## Sheet: Figure 2A
Genotype	Animals with two intact axons	Animals with degeneration	Total number of animals	Fraction of animals with two intact axons
ric-7(n2657)	0	36	36	0
ric-7(n2657); unc-43(wp64)	33	2	35	0.942857
ric-7(n2657); unc-43(n498sd)	29	2	31	0.935484
OR unc-43(e408)	0	35	35	0
ric-7(n2657) + PVQ::UNC-43(WT)	9	34	43	0.209302
ric-7(n2657) + PVQ::UNC-43(CA)	27	12	39	0.692308

## Sheet: 2C
Genotype	Age	Animals with two intact axons	Animals with degeneration	Total number of animals	Fraction of animals with two intact axons
unc-116(rh24sb79)	L3	61	2	63	0.968254
	L4	12	61	73	0.164384
	1doa	0	50	50	0
unc-116(rh24sb79); unc-43(n498sd)	L3	37	1	38	0.973684
	L4	42	7	49	0.857143
	1doa	29	26	55	0.527273

## Sheet: 2E
Normalized UNC-43 intensity at L3
Cell body				Distal axon
wt	ric-7	ric-7+chimera		wt	ric-7	ric-7+chimera
1.12103	0.848849	0.452051		1.1729	0.217862	0.259293
0.816275	1.06241	1.0578		0.508035	0.219365	0.50238
1.13276	0.388928	1.01492		0.924841	0.241165	0.458841
0.46908	0.591275	1.1717		0.841948	0.17561	1.56025
1.12539	1.02385	1.05505		0.742941	0.261741	0.639502
0.801141	0.974215	0.779082		1.18465	0.335586	0.874408
0.728557	0.861158	0.813635		0.791902	0.491766	0.505463
0.929436	0.708478	0.843248		0.633599	0.132195	0.588542
0.808852	1.10925	1.43291		1.08617	0.517378	0.648458
1.15727	1.1162	0.740476		1.09472	0.377064	0.704453
0.995895	1.45522	1.14997		1.36351	0.751416	0.933828
1.13308	1.47562	0.691722		1.18601	0.362949	0.376707
1.26285	1.18182	1.33379		0.795125	0.769126	0.336981
0.969867	0.880451	0.996031		1.01433	0.177856	0.430301
0.869758	0.594521	0.613714		0.423406	0.32426	0.518153
0.614012	0.81358	0.52448		0.899741	0.191352	0.603897
0.922594	1.35324	0.375968		0.996997	0.825818	0.545887
0.441617	1.03685	0.726387		0.61967	0.377436	0.305047
1.02492	0.767247	0.765704		1.6129	0.360253	0.300802
1.32584	1.00043	1.66298		1.07678	0.195551	0.438931
1.77559	1.03557	0.804933		1.26227	0.538977	1.71747
1.46111	1.02042	1.04773		1.68865	0.313352	0.543439
1.11307	1.38959	1.38323		1.07891	0.319038	0.962554
	0.852835				0.464884	1.55554
	0.976186					0.915126

## Sheet: 2G
Genotype	Animals with two intact axons	Animals with degeneration	Total number of animals	Fraction of animals with two intact axons
ric-7; unc-43gof	31	4	35	0.885714
ric-7; unc-43gof; tir-1(qd4)	0	37	37	0
ric-7; unc-43gof; nsy-1(ok594)	0	33	33	0
ric-7; unc-43gof; pmk-1	29	4	33	0.878788
ric-7; unc-43gof; pmk-3	0	27	27	0
ric-7; unc-43(n498sd); cebp-1(tm2807)	12	36	48	0.25

## Sheet: 2H
Genotype	Animals with two intact axons	Animals with degeneration	Total number of animals	Fraction of animals with two intact axons
ric-7	0	24	24	0
ric-7; tir-1(qd4)	0	30	30	0
ric-7; tir-1(ok2859)	0	25	25	0
ric-7(n2657) + WT tir-1	19	16	35	0.542857
