# Supplementary material for: Activation of the CaMKII-Sarm1-ASK1-p38 MAP kinase pathway protects against axon degeneration caused by loss of mitochondria
Source: eLife. 2022 Mar 14;11:e73557. doi: 10.7554/eLife.73557 (PMC8920508; doi:10.7554/eLife.73557)
Supplement: Figure 3—source data 1. [file elife-73557-fig3-data1.xlsx]

## Sheet: Figure 3B
Genotype	Animals with two intact axons	Animals with degeneration	Total number of animals	Fraction of animals with two intact axons
ric-7(n2657)	0	25	25	0
ric-7; casy-1(wp60)	20	2	22	0.909091
ric-7(n2657); casy-1(wp78)	23	7	30	0.766667
ric-7; casy-1(wp60) + fosmid	3	29	32	0.09375
ric-7(n2657); casy-1(tm718)	0	49	49	0

## Sheet: 3D
Genotype	Animals with two intact axons	Animals with degeneration	Total number of animals	Fraction of animals with two intact axons
ric-7(n2657); casy-1(wp60)	21	2	23	0.913043
ric-7(n2657); casy-1(wp60) + sra-6p::casy-1a	0	76	76	0
ric-7(n2657); casy-1(wp60) + sra-6p::casy-1b	13	84	97	0.134021
ric-7(n2657); casy-1(wp60) + sra-6p::casy-1c	4	76	80	0.05
ric-7(n2657); casy-1(wp60) + sra-6p::casy-1 TM+cyto	3	27	30	0.1
ric-7(n2657); casy-1(wp60) + sra-6p::casy-1a no KBS	41	6	47	0.87234
ric-7(n2657); casy-1(wp60) + sra-6p::casy-1 cyto	51	5	56	0.910714

## Sheet: 3E
Genotype	Animals with two intact axons	Animals with degeneration	Total number of animals	Fraction of animals with two intact axons
ric-7(n2657)	46	5	51	0.901961
ric-7(n2657); casy-1(wp60)	42	2	44	0.954545
ric-7(n2657); casy-1(wp60) + sra-6p::casy-1c	1	42	43	0.0232558
casy-1(wp60) + sra-6p::casy-1c	34	0	34	1
