# Supplementary material for: Activation of the CaMKII-Sarm1-ASK1-p38 MAP kinase pathway protects against axon degeneration caused by loss of mitochondria
Source: eLife. 2022 Mar 14;11:e73557. doi: 10.7554/eLife.73557 (PMC8920508; doi:10.7554/eLife.73557)
Supplement: Figure 4—figure supplement 1—source data 1. [file elife-73557-fig4-figsupp1-data1.xlsx]

## Sheet: Figure 4-figure supplement 1C
Genotype	Animals with two intact axons	Animals with degeneration	Total number of animals	Fraction of animals with two intact axons
ric-7(n2657)	0	26	26	0
ric-7(n2657); casy-1(wp78)	14	6	20	0.7
ric-7(n2657); casy-1(wp78) + PVQ::CASY-1C::GFP(C terminal)	2	21	23	0.0869565

## Sheet: Figure 4-figure supplement 1E
	Number of anterograde events	Number of reterograde events	Percentage of anterograde events
casy-1(wp78)	1125	262	81.1103
ric-7(n2657);casy-1(wp78)	604	353	63.1139

## Sheet: Figure 4-figure supplement 1F
CASY-1 anterograde speed (μm/s)			CASY-1 retrograde speed (μm/s)
casy-1(wp78)	ric-7(n2657); casy-1(wp78)		casy-1(wp78)	ric-7(n2657); casy-1(wp78)
1.00761	0.497833		2.15364	1.20167
1.18021	0.2575		4.47654	1.09438
1.21802	0.636176		1.90741	0.8755
1.04493	0.655455		2.48543	0.594231
1.29581	0.171667		2.23167	0.629444
1.2987	0.275893		3.32409	0.491591
1.30467	0.9785		1.545	0.569211
0.983182	0.9064		2.575	0.7725
1.26543	0.396154		3.42324	0.352169
1.2716	0.198077		2.52595	1.18846
1.32429	0.416905		0.972778	0.278378
0.889545	0.528553		1.71667	0.637619
1.21302	0.406579		1.545	1.49595
1.10357	1.14885		1.09438	0.944167
0.942073	1.56481		1.2875	0.696765
1.26409	0.449455		3.89111	0.239107
0.987083	0.789667		1.57075	0.243455
1.60938	1.14885		1.99133	0.374545
1.21974	0.698929		1.86688	0.2575
1.2875	0.972778		2.23167	0.2575
1.236	0.90125		1.99562	0.3914
1.03	0.365484		1.2875	0.554615
0.831923	0.725682		2.06	0.466719
0.813158	1.63083		3.10661	0.343333
1.58462	0.515		1.2875	0.629444
1.35187	0.573857		1.85122	1.22074
1.07292	0.429167		1.9619	1.16733
1.31611	0.615139		1.751	0.564839
1.17456	0.735714		1.545	0.624242
1.00889	0.8961		1.22313	0.766778
1.16205	0.721		1.03	0.944167
1.33042	1.03		2.28071	0.339146
1.43056	0.618		3.19655	0.662143
0.90125	0.354063		1.08722	0.866136
0.809286	0.515		2.86469	1.03
0.743889	0.431935		2.81735	0.950769
1.22486	0.33475		2.54281	0.542105
1.25889	0.608636		2.06	0.529714
1.31091	0.809286		3.09	1.15875
0.801111	0.858333		2.40333	1.03
1.21628	0.721		1.26409	0.549333
1.00139	0.275893		1.24206	0.515
0.9064	0.394833		1.30467	1.03
0.788594	0.4635		2.37692	0.557917
1.03	0.515		3.24147	0.355818
0.919643	0.515		1.7007	0.378676
1.15262	0.457778		3.27025	0.555658
1.30657	0.931905		1.10923	0.459821
1.16174	0.325263		1.82591	1.37333
1.19186	0.515		1.87026	0.671739
0.9064	0.515		1.8746	0.561818
1.42795	0.425435		3.10561	1.03
1.38605	0.220714		1.68707	0.450625
1.62547	0.515		2.575	0.41963
1.23317	0.403043		1.8025	0.487895
0.892667	0.588571		3.193	0.487895
0.801111	0.530147		0.90125	1.77389
0.848235	0.608636		1.87273	0.468182
1.27033	0.702273		2.66083	0.559783
1.236	1.21974		2.2145	0.543611
0.782037	0.696765		2.68944	1.86688
1.18846	0.983182		3.21485	0.64375
0.983182	0.466284		1.48063	1.0197
1.18021	0.752692		3.14518	1.2875
1.32816	0.570676		3.51543	0.752692
1.0815	0.7725		2.63222	1.10573
0.927	0.611563		2.7295	0.956429
1.03	0.686667		2.23167	0.570843
1.06433	0.605882		1.47143	0.686667
1.01977	0.447826		1.5965	0.515
0.824	0.600833		1.71667	0.579375
0.801111	0.858333		0.809286	0.629444
0.69525	0.572222		3.2342	1.11715
0.877407	0.64375		2.8325	0.600833
0.858333	0.571438		2.3278	0.842727
1.07176	0.354063		2.33731	0.446333
0.686667	0.7725		1.5965	0.858333
1.18793	0.606964		1.03	0.579375
1.33519	0.515		3.63719	0.917344
1.22808	0.3914		3.47625	0.804688
0.9785	1.545		2.43194	1.10357
1.25071	0.43697		2.18875	0.412
1.26584	0.652333		2.70375	0.227206
1.45707	0.515		1.20167	0.224859
1.35526	0.610931		2.75259	0.271053
1.03	0.608636		2.884	1.03
1.24546	0.618		2.64523	0.400556
1.24206	0.7725		3.04209	0.441429
1.18725	0.515		2.51063	1.09438
1.18846	0.515		0.961333	1.03
1.21322	0.618		1.73227	0.662143
1.545	0.858333		2.71707	1.12088
1.03	0.708125		1.88833	1.05861
0.7725	0.5665		1.82089	0.831923
1.30589	1.3905		2.0085	0.515
0.944167	0.673462		1.67935	0.43775
0.882857	0.53307		0.975789	1.05452
1.47143	0.686667		2.27684	0.6695
0.813158	0.7725		2.575	1.48778
1.43056	0.815417		2.10879	0.815417
1.36943	0.836875		3.38816	0.836875
1.31871	0.645861		1.44898	1.03
1.42382	0.658056		1.75958	1.4832
1.24684	0.412		2.22094	0.789667
1.35426	0.744662		1.65536	0.608636
1.56646	0.686667		1.72413	0.944167
1.62225	0.662143		2.884	0.919643
1.19094	0.569787		1.47783	0.789667
1.22313	0.474608		1.8025	0.7622
1.65536	0.629444		1.2078	0.662143
1.42558	0.572222		1.69759	0.686667
1.07292	0.600833		1.07682	0.956429
1.16352	0.501795		1.545	0.820781
1.49902	0.882857		1.70346	0.842727
1.28072	0.388878		1.38654	0.820185
1.34565	0.708125		1.545	0.852414
1.40767	0.678864		1.00139	0.946935
1.22877	0.482128		1.19263	0.948684
1.50208	0.588571		1.92873	0.867368
1.442	0.515		1.21393	0.5562
0.970577	0.629444		0.990385	0.965625
1.46103	0.563281		1.42382	0.655455
1.33519	0.7725		1.43799	0.927
1.43464	0.90125		1.64037	0.90125
1.37333	0.90125		1.545	1.339
0.997812	0.824		2.25808	0.84975
1.00761	0.588571		2.33616	1.12364
1.31461	0.713077		1.98643	0.9064
1.37333	0.721		2.369	0.735714
1.23798	0.6695		2.575	0.787647
0.944167	0.629444		2.472	0.729583
1.14444	0.7725		2.38526	0.927
1.38654	0.675938		3.09	0.858333
1.32088	0.740313		1.73812	0.686667
1.00854	1.03		2.37348	1.0815
0.911154	0.3914		2.17036	0.792308
1.09867	0.53307		2.69129	0.915556
1.08722	0.752692		1.48778	0.915556
1.07984	0.579375		2.575	1.05452
1.03	0.343333		2.25808	1.11583
1.19386	0.686667		2.46234	0.858333
1.31325	0.678864		2.91833	0.965625
1.14444	0.7828		2.08711	0.848235
1.20867	0.64375		2.79571	0.858333
1.03	0.708125		2.11722	0.749091
1.4935	0.824		1.33294	0.975789
1.18846	0.662143		1.31611	0.889545
1.36277	0.760238		2.08341	0.919643
1.2875	0.314722		1.63864	0.91371
1.30731	0.515		1.33432	0.67726
1.45543	0.568276		1.37333	0.608636
1.37333	0.515		1.82702	0.648519
1.46116	0.3708		1.51925	0.836875
1.51925	0.545294		1.3905	0.7828
1.34692	0.343333		1.88087	0.792308
1.68233	0.5768		2.17444	1.14885
1.34268	0.515		1.72676	0.5665
1.03	0.450625		1.8469	0.543611
1.32816	0.64375		1.87607	0.815417
1.2875	0.268696		1.7613	0.515
1.36324	0.457778		1.74732	0.733485
1.39241	0.702273		1.09438	0.851731
1.24684	0.64375		0.749091	1.07682
1.08568	0.7725		1.78994	1.09438
1.14135	0.7725		1.14444	0.882857
1.26086	0.915556		1.53404	0.7725
1.14444	0.559143		1.24788	0.743889
1.15197	0.489878		1.24068	0.965625
1.1857	0.7725		1.08942	0.758947
1.03	0.441429		1.06388	0.801111
1.33042	0.836875		0.836875	0.721
1.37838	0.515		1.45079	0.931383
0.806087	0.927		1.75958	1.23028
0.761304	0.363529		1.47143	0.686667
0.972778	0.735714		1.68545	0.529714
0.805513	0.490476		1.45543	0.760238
1.44844	1.20167		1.56217	0.961333
0.927	0.482813		1.3893	1.65944
1.37333	0.515		1.339	1.25889
1.18846	1.03		1.30327	1.26769
0.975789	0.6695		1.59979	1.08942
1.03	0.545294		1.41012	0.757353
1.14512	0.557917		1.38876	0.740313
1.08722	0.588571		1.69214	0.995667
1.03	0.927		1.69408	0.575588
1.20167	1.11583		1.09867	0.848235
0.839259	0.927		1.64346	1.236
1.31428	0.588571		1.42795	0.550517
0.927	0.515		1.16604	0.686667
1.27796	0.7725		1.71667	0.515
1.16257	0.41963		1.27441	0.633846
1.15315	1.03		1.1845	1.1845
1.15118	0.686667		1.16352	0.921579
1.08722	0.757353		1.34348	0.625357
0.8755	1.339		1.8025	0.575588
1.31611	0.603286		2.01095	0.817941
0.795909	0.572222		1.89446	0.792308
0.956429	0.919643		2.39324	0.889545
1.12364	0.557917		1.69214	0.666471
0.686667	0.686667		1.15875	0.7725
1.38654	0.618		1.133	0.7725
1.17554	0.515		2.27458	0.8755
1.07828	0.7725		2.74667	0.636176
1.28035	0.7725		2.42353	0.7725
1.27141	0.633021		2.98466	0.846071
1.00289	0.9785		3.34014	0.830645
0.987083	0.652333		2.9355	1.10357
1.22808	1.133		1.52661	0.702273
1.11475	1.03		1.94556	0.858333
1.20167	0.801111		6.695	0.713077
1.13076	0.64375		2.76227	0.980952
1.35187	0.71119		3.97286	0.557917
1.31091	1.11583		2.23167	1.35773
1.25391	0.557917		2.35429	1.31091
0.990385	0.936364		5.7165	0.64375
1.03	0.7725		2.66083	0.5665
0.662143	0.721		1.41625	0.858333
0.789667	0.915556		1.64576	0.600833
0.987083	0.636176		1.545	0.633846
0.846071	0.927		3.89929	0.686667
0.686667	0.795909		1.76891	0.650526
1.09306	0.600833		3.605	0.704737
1.10357	0.7725		2.94286	0.564048
1.36107	0.339432		1.97417	0.545294
1.37333	0.362407		2.47963	1.22313
1.1063	0.927		1.8025	0.731842
1.12088	0.515		2.23167	0.836875
0.914125	0.824		4.67792	0.6695
1.10357	0.43697		2.35429	0.956429
0.743889	0.743889		4.48786	0.686667
0.950769	0.539524		2.87212	0.944167
1.20167	0.4532		3.09	0.423036
0.95275	0.618		2.85961	0.461724
1.2154	1.03		2.72214	0.570676
0.858333	0.743889		3.67857	0.588571
1.133	0.733485		2.06	1.03
1.25889	0.64375		3.605	0.550517
1.133	0.515		2.86111	0.596316
1.07905	0.754107		4.635	0.5665
0.936364	0.588571		1.08942	0.536458
0.882857	0.686667		2.3058	0.713077
0.64375	0.600833		1.87824	0.7725
0.9888	0.575588		1.77031	0.572222
0.871538	1.03		3.38109	0.515
1.03	0.965625		3.07339	0.658056
1.12196	0.749091		1.18147	0.527561
0.747581	0.629444		1.65342	0.729583
1.03	0.483788		1.4935	0.7725
1.133	0.702273		3.04708	0.975789
0.824	1.03		1.442	0.529306
0.956429	0.90125		1.51067	0.871538
1.22619	0.662143		1.2875	0.636176
1.45917	0.7725		2.02321	0.64375
0.993214	0.831923		2.40333	0.633846
0.984559	0.5356		2.575	0.792308
0.6798	0.515		2.02567	0.792308
0.7725	0.6695		0.54075	0.686667
0.686667	1.03		0.731842	0.784762
1.05575	0.858333		1.91286	0.655455
1.03	1.15875		1.22313	0.908824
1.37333	0.629444		1.648	0.6695
1.21727	0.554615		2.26028	0.618
0.79825	0.749091			0.618
1.26769	0.7725			0.944167
0.939118	0.824			0.416905
0.959773	0.938036			0.222703
1.21393	0.3605			0.355172
1.65536	0.579375			0.307193
1.37946	0.377667			0.271806
1.07905	0.608636			0.274667
0.735714	0.400556			0.343333
1.37333	0.412			0.848235
1.12364	0.64375			0.729583
1.20167	1.03			0.784205
1.64156	0.721			1.49079
0.836875	0.889545			1.47633
1.06219	0.543611			1.17714
1.03678	0.824			0.366442
1.05341	0.708125			0.412
0.912955	0.625357			0.284894
1.13894	0.594231			1.08942
1.13534	0.611563			0.85087
1.10613	0.575588			1.15875
0.950769	0.528919			0.404643
1.03	0.662143			0.7725
1.17554	0.382097			1.2875
1.38654	0.302941			0.793958
0.7725	0.343333			0.950769
1.27235	0.515			0.749091
0.944167	0.457778			1.33042
0.824	0.450625			1.03
1.2987	0.608636			0.815417
1.28224	0.721			1.48778
0.743889	0.600833			0.858333
0.915556	0.534074			0.662143
1.24684	0.650526			1.4935
1.0627	1.10357			1.03
1.12364	0.64375			0.743889
0.882857	0.454412			1.6995
0.824	0.618			0.397955
1.03	0.468182			0.886944
1.15875	0.686667			0.993214
1.03	0.48925			0.608636
1.45412	0.291087			0.579375
0.751042	0.480667			1.11583
1.28407	0.590735			0.90125
0.877407	0.600833			0.959773
0.991852	0.515			1.11583
0.871538	0.549333			0.7725
0.990385	0.735714			0.708125
0.655455	0.5665			0.817941
1.03	0.7725			0.429167
1.08942	1.03			0.846071
1.22313	0.468182			1.15875
1.32109	0.354063			0.797419
1.08722	0.735714			0.831923
0.801111	0.721			0.858333
1.07578	0.618			0.7725
0.995667	0.490476			1.84542
1.18846	0.652333			0.650526
1.15875	0.484706			0.686667
1.39241	0.7725			1.09438
1.30359	1.15875			0.64375
1.03	0.686667			1.07292
0.755333	0.858333			0.686667
1.18846	1.133			0.7725
1.21393	0.824			0.993214
0.956429	0.561818			2.3175
1.236	0.600833			0.686667
0.972778	0.721			0.48925
1.11132	0.396154			1.05452
1.21974	0.858333			0.758947
1.00488	0.515			0.831923
1.35066	0.393824			0.7725
1.46577	0.515			0.613095
1.03	0.809286			0.792308
0.965625	0.809286			1.43464
1.35187	0.557917			0.871538
1.1845	0.588571			1.22808
1.20167	0.727059			1.39786
1.31461	0.618			0.686667
1.0918	1.06961			1.545
1.31779	0.7725			1.25071
1.25071	0.608636			0.801111
1.19263	0.871538			1.15875
0.743889	0.795909			1.339
1.35773	0.662143			0.588571
0.969412	0.715278			0.758947
1.14444	0.572222			1.03
1.03	0.757353			0.927
0.987083	0.858333			0.792308
1.25071	0.858333			0.944167
0.972778	0.686667			0.7725
0.792308	0.686667
1.236	0.708125
0.662143	0.927
1.133	0.915556
1.38654	0.7725
1.47477	0.686667
0.848235	0.515
0.944167	0.618
0.858333	1.2875
1.01679	1.2875
0.858333	0.9785
1.14444	0.858333
0.858333	0.927
1.45412	0.515
0.965625	0.564839
0.929239	0.515
1.04515	0.824
0.729583	0.801111
1.19263	0.696765
1.02028	0.572222
0.993214	0.625357
0.686667	1.03
0.9785	0.457778
1.35187	0.561818
1.37333	0.721
1.91955	0.3605
2.36042	0.7725
1.236	0.515
1.30731	0.554615
0.686667	0.515
1.03	0.515
1.16733	0.662143
1.236	0.766512
1.53708	0.858333
0.9785	0.515
0.64375	0.7725
0.93463	0.372931
1.07682	0.450625
1.03	0.515
1.133	0.298158
0.939118	0.515
1.21727	0.721
0.927	0.618
0.575588	0.61037
1.14444	0.64375
0.971143	0.588571
1.12137	0.355595
0.90125	0.956429
0.652333	0.515
0.930323	0.7725
1.48614	0.364792
0.990385	0.5562
1.1281	0.412
1.03	0.515
1.35314	0.658056
1.26086	1.25889
1.13116	0.7725
1.11583	0.435769
1.06359	0.515
1.10357	0.515
1.27033	0.715278
0.713077	0.686667
0.919643	0.731842
1.17714	1.03
1.22227	0.600833
0.972778	0.64375
1.00659	0.515
1.03	0.655455
1.09438	0.64375
1.14885	0.482813
0.8961	0.438704
1.00139	0.6695
1.00289	0.481987
1.06962	0.397955
1.06219	0.585227
1.03	0.355172
0.889545	0.456143
1.6431	0.574423
1.35865	0.686667
1.22664	0.702273
1.23232	0.323372
0.9785	0.395446
0.920426	0.481774
1.51067	0.515
1.05641	0.618
0.956429	0.43775
0.794891	0.611563
1.09438	0.7725
0.946935	0.474127
0.985857	0.461724
0.915556	0.704737
1.16352	0.7725
0.878529	0.7725
1.03	0.990385
1.06029	0.787647
1.38654	0.8034
0.950769	1.08722
0.917123	1.09438
1.04515	0.927
0.958966	1.42483
1.1845	0.573857
0.927	0.836875
1.18846	0.956429
1.01019	0.7725
1.14036	1.07682
0.962826	0.815417
0.983182	0.588571
1.01949	1.14444
1.17714	0.611563
0.698929	0.735714
1.07682	0.836875
1.17045	0.995667
0.906019	1.15875
1.07292	0.936364
0.972778	0.965625
0.907156	0.7725
0.795909	0.755333
1.88833	0.927
1.545	1.15875
0.801111	0.426207
1.03	0.314722
1.38406	0.792308
1.52159	1.648
1.19213	1.12364
1.42795	1.63083
0.836875	0.686667
1.35617	0.618
0.944167	0.412
0.829024	0.348871
1.12904	0.321875
0.985857	0.468182
1.26039	0.572222
1.24684	0.554615
1.09717	0.4635
0.787647	0.358261
1.88173	0.4635
1.31242	0.608636
0.881442	0.472083
0.886944	0.515
1.37333	0.515
1.25071	0.356538
0.987083	0.41963
0.929861	0.371944
0.915556	0.515
1.33294	0.549333
0.836875	0.2678
0.980952	0.90125
1.01904	0.809286
0.984559	0.43775
0.858333	0.702273
1.03	0.652333
1.09867	0.564048
1.11583	0.7725
1.09225	0.686667
1.12	0.604565
1.14196	0.441429
1.08722	1.22074
1.03	1.30265
0.967365	0.515
1.04112	0.795909
1.37333	0.64375
1.07682	0.6386
1.06472	0.851731
0.90125	0.677632
0.780303	0.834655
0.686667	0.820185
0.995667	0.780303
0.7725	1.14036
0.999706	1.07682
0.965625	0.848235
1.11583	0.515
0.977179	0.944167
1.05861	1.339
0.755333	1.0815
1.61857	0.927
0.95814	1.133
0.878529	0.515
1.12656	0.400556
0.983182	0.721
1.32429	0.686667
1.06815	1.32429
0.824	1.15875
1.45917	1.03
0.795909	0.882857
0.588571	0.965625
0.993214	0.59225
1.03	1.10357
1.03	0.551786
0.811515	1.14444
0.843723	0.755333
1.14036	0.729583
0.836875	0.608636
0.956429	0.649348
1.03	0.629444
0.924898	0.972778
0.881938	0.7725
0.824	1.31611
0.915556	0.749091
0.994726	0.886944
1.21176	0.652333
1.00289	0.64375
0.915556	0.652333
0.655455	0.944167
0.983182	1.08421
0.783696	0.743889
0.708125	0.487895
1.03	1.27033
1.09438	0.662143
1.06433	0.666471
0.743889	0.721
0.6695	1.03
0.754107	0.944167
0.607986	1.133
0.608636	1.32429
0.622292	0.919643
0.64538	0.673462
1.07682	0.987083
1.18846	0.611563
1.5965	1.15875
1.545	0.542105
1.28072	0.801111
1.22534	0.615139
1.09059	1.03
0.858333	0.662143
1.22313	1.648
0.987083	1.15875
0.636176	0.708125
1.21727	1.09867
1.71667	1.21727
1.26298	0.944167
1.03	1.10357
1.49818	0.457778
0.828828	0.515
0.927	1.11583
1.30359	0.4738
0.915556	0.743889
1.03	0.64375
1.2875	0.468182
1.26409	0.561818
1.22313	0.636176
1.36107	1.12364
1.20167	0.382097
1.35773	0.858333
1.37333	0.7725
0.909833	0.743889
0.998788	1.03
1.11132	0.608636
1.17045	0.956429
0.995667	1.10357
1.442	1.77389
1.2875	0.7004
1.2875
1.08942
1.1124
1.24653
1.48778
1.14885
1.15875
1.25531
1.03
0.831923
0.902248
0.882857
1.05006
1.20458
1.04884
0.965625
1.38114
1.03
0.936364
1.09438
0.815417
1.442
1.32429
0.927
0.59225
1.07682
0.702273
0.983182
0.927
1.03
1.23152
0.919643
1.236
1.648
1.2527
1.11957
0.869062
1.1845
1.10357
1.06962
1.25391
0.729583
1.442
0.735714
0.882857
1.71667
1.35187
1.13924
0.858333
1.1845
0.90125
1.03
1.07292
1.03
1.06552
0.927
1.37333
0.547188
0.755333
0.980952
0.7725
0.975789
0.733485
0.698929
0.907381
1.09059
1.09438
0.956429
1.1845
1.40767
0.90125
1.25071
1.11583
1.30731
1.2875
0.90125
1.15875
1.32429
1.05146
1.1845
1.15875
1.14444
0.954265
0.987083
1.21883
0.824
0.618
1.69214
1.03
1.27395
1.442
1.05575
1.27524
1.04776
1.32429
1.06029
0.7725
1.03
0.972778
0.831923
0.930962
1.03
0.858333
1.30265
0.899206
1.06593
0.724815
1.3905
0.95275
0.975789
0.990385
0.915556
1.14036
1.10923
0.882857
0.956429
0.8755
0.836875
0.7725
0.911154
1.03
0.871538
0.836875
1.22313
0.686667
1.11583
0.882857
1.10357
0.749091
0.965625
0.755333
0.858333
0.840263
0.7725
0.90569
0.946163
0.970577
0.990385
1.42615
0.686667
0.778222
0.889545
0.84975
0.788265
1.01529
0.976354
1.07682
1.32429
0.90125
1.07905
0.886279
1.03
0.786053
0.755333
0.614038
0.919643
1.15875
0.846889
0.582174
0.918043
1.03
0.686667
1.12364
1.09438
1.12364
1.339
0.858333
0.655455
0.6592
0.749091
1.339
0.843534
1.32429
0.572222
0.64375
0.689576
1.133
0.927
1.35773
1.09867
0.778488
0.809286
1.22313
0.835135
0.858333
0.993214
0.824
0.67152
1.00548
0.944167
0.799138
0.944167
0.605882
0.8755
0.749091
1.18846
0.618
0.777979
0.655455
0.858333
0.919643
0.8858
0.658056
0.721
0.931905
0.840263
0.836875
1.1659
0.920562
0.917344
1.19554
1.31611
0.7725
0.478214
0.735714
0.655455
0.4738
0.749091
0.993214
0.64375
0.824
0.927
1.29276
1.03
1.21393
0.882857
0.965625
0.858333
0.721
1.00289
1.15875
1.09776
1.32429
1.03
0.944167
1.19554
1.26409
1.15875
0.941484
1.73812
1.2875
1.648
0.927
0.887931
1.339
1.34809
1.48063
1.69214
1.339
1.133
1.2875
1.05239
1.24788
1.08722
1.00289
1.10357
1.20167
1.03
0.972778
1.45917
1.20167
0.930323
0.912286
1.03
1.44844
1.12244
1.17714
1.10357
1.03
1.21176
1.11583
1.32429
1.20167
1.30467
0.83381
0.915556
1.545
1.43056
1.1124
1.18846
1.45917
1.01949
1.25071
1.03
0.892667
1.11957
1.35187
1.13131
1.10725
1.11583
1.20167
0.721
1.2875
0.90125
0.972778
0.911154
1.03
1.15875
0.956429
1.41625
0.6695
1.03
1.15875
1.03
0.927
1.33042
0.792308
1.545
1.442
0.721
0.911154
1.20167
0.944167
1.03
0.90125
1.21727
1.11583
0.944167
0.944167
0.90125
1.545
0.90125
0.743889
1.03
1.06323
0.944167
0.993214
0.858333
0.999706
1.84542
1.11583
0.804688
0.547188
1.10357
0.944167
0.686667
1.01529
1.11583
1.2875
0.840263
0.990385
1.236
0.842727
0.852414
0.858333
1.15875
1.27524
0.686667
1.48778
1.2875
0.858333
1.2875
0.588571
0.915556
0.7725
0.824
1.41625
0.721
1.45917
1.20167
1.17714
0.919643
1.24458
1.03
0.824
1.09717
1.24458
1.09059
1.31611
0.965625
1.5965
0.997812
1.00191
0.993214
1.16273
1.17952
0.858333
1.35187
1.06219
1.12196
1.56952
0.475385
1.20167
1.2875
1.32429
1.05861
0.871538
1.35187
1.25239
1.03
1.41625
1.26604
1.32429
0.795909
0.944167
1.22313
1.20167
1.07
0.948684
1.20167
0.515
1.14444
0.965625
1.236
0.721
0.7725
0.6592
1.08722
0.983782
1.18846
1.08722
1.17045
0.927
1.03
0.90125
0.9785
1.27862
1.30467
0.927
1.03
1.17526
1.03
1.33042
1.20827
1.37333
1.0412
1.15875
1.18807
0.956429
1.30896
1.03
0.975789
1.20167
1.133
0.965625
1.12743
1.40016
1.03
1.133
1.03
1.21393
0.911154
1.27235
1.40767
0.957372
0.90125
0.682375
1.27395
0.956429
0.783696
0.908824
0.944167
0.403043
0.829722
1.03
1.20167
1.16553
0.90125
1.09438
1.03
0.721
0.916951
1.15875
1.10186
0.99395
0.946935
1.36587
1.25889
0.892667
1.17045
0.889545
0.686667
1.09645
1.45917
1.15875
0.795088
1.545
0.812734
0.717879
0.792308
1.47143
1.22313
1.14444
1.11583
1.1063
0.995667
0.983182
1.15875
1.03
1.22313
1.24392
1.14108
1.10357
1.05239
0.858333
0.708125
0.743889
1.00191
1.20167
1.19059
1.20399
1.22808
1.23437
1.17352
1.29581
1.2875
0.490476
1.15875
0.91371
0.721
1.06029
0.816463
1.1845
0.801111
1.29581
0.515
0.921579
1.10725
1.06433
0.927
0.721

## Sheet: Figure 4-figure supplement 1G
CASY-1 anterograde run length (μm)			CASY-1 retrograde run length (μm)
casy-1(wp78)	ric-7(n2657); casy-1(wp78)		casy-1(wp78)	ric-7(n2657); casy-1(wp78)
9.27	2.987		4.738	6.489
5.665	1.648		11.639	7.004
15.347	2.163		10.3	1.751
14.42	2.884		11.433	3.09
24.102	4.12		13.39	2.266
17.922	1.545		14.626	2.163
3.914	5.871		11.433	2.163
17.304	4.532		4.635	0.927
8.858	1.03		11.639	9.579
20.6	1.03		10.609	3.09
18.54	1.751		1.751	4.12
3.914	4.017		3.09	2.678
29.355	3.09		1.236	12.566
6.18	2.987		1.751	2.266
7.725	8.137		1.545	2.369
5.562	4.944		7.004	1.339
2.369	2.369		12.566	2.678
2.575	2.987		5.974	0.824
4.635	1.957		2.987	1.133
4.12	1.751		2.678	0.927
2.472	1.442		3.193	1.957
3.502	2.266		3.09	1.442
6.489	3.193		3.296	5.974
3.09	7.828		38.522	0.824
4.12	1.03		2.575	3.399
2.163	4.017		13.699	6.592
2.575	1.03		8.24	3.502
7.107	4.429		3.502	3.502
13.39	3.09		3.09	4.12
24.617	8.961		1.957	6.901
9.064	1.442		1.854	1.133
3.193	1.442		6.386	2.781
2.575	0.618		18.54	0.927
0.721	1.133		1.957	3.811
1.133	0.412		9.167	1.236
1.339	2.678		9.579	2.472
9.064	1.339		8.137	6.18
2.266	1.339		5.768	3.708
5.768	1.133		24.102	0.927
2.884	1.03		5.768	2.678
11.433	0.721		2.781	1.648
3.605	1.545		4.223	1.854
4.532	11.845		3.914	0.824
5.047	0.927		24.72	2.678
1.648	0.618		22.042	3.914
7.725	0.824		14.626	2.575
14.523	0.824		13.081	4.223
14.111	3.914		2.884	2.575
9.991	1.236		4.017	2.472
8.343	0.515		7.107	3.09
4.532	0.927		9.373	6.18
12.566	1.957		20.497	2.678
22.454	1.236		9.785	1.442
10.403	0.927		4.635	4.532
26.883	1.854		7.21	1.854
2.678	0.824		44.702	3.708
2.884	3.605		1.442	3.193
2.884	1.339		4.12	2.06
3.811	1.545		12.772	5.15
8.652	4.635		4.429	3.914
4.223	2.369		9.682	2.987
3.09	2.163		21.218	2.06
4.326	6.901		2.369	10.197
11.33	3.914		17.613	1.545
10.094	4.223		16.171	1.957
2.163	2.163		9.476	7.519
2.781	1.957		5.459	4.017
6.18	1.648		8.034	9.476
6.386	2.06		2.06	1.648
30.797	2.06		3.193	1.545
3.296	1.442		3.09	0.927
2.884	1.03		3.399	1.133
2.781	1.03		32.342	14.523
4.738	1.545		15.862	2.884
3.09	8.343		11.639	1.854
7.931	1.133		12.154	2.678
4.12	1.236		3.193	1.03
17.819	3.399		1.236	0.927
7.21	0.824		11.639	5.871
6.386	3.914		8.343	5.15
5.871	1.236		8.755	3.09
3.502	2.884		1.751	1.236
27.089	7.828		6.489	1.545
11.948	1.957		2.163	3.193
10.3	12.463		15.965	2.06
3.914	1.339		5.768	2.472
24.411	1.236		23.278	0.721
4.223	0.618		26.162	0.618
31.106	0.927		8.034	1.751
3.09	2.163		2.884	1.03
25.235	0.618		3.811	1.854
3.09	1.03		31.518	3.811
1.03	1.133		4.532	3.811
1.545	1.133		10.197	2.163
7.313	2.781		16.068	0.927
4.532	1.751		7.725	1.751
2.472	6.077		18.54	4.429
4.12	1.236		17.304	1.339
3.09	1.545		10.815	2.678
2.575	1.957		40.067	1.957
12.051	1.339		25.75	1.339
17.407	15.759		17.098	0.824
9.682	2.369		16.892	7.416
4.738	1.648		14.214	2.369
7.313	11.021		4.635	1.339
7.519	2.472		7.931	4.532
6.489	3.708		5.768	2.575
3.811	5.356		6.798	2.369
1.957	4.841		10.094	3.811
4.635	1.133		20.291	0.927
19.673	2.06		9.167	1.648
2.575	2.884		4.738	8.034
6.283	3.914		3.09	5.253
16.789	1.236		8.858	12.978
19.467	3.811		7.21	4.429
16.686	1.133		7.725	4.944
12.669	2.987		3.605	5.871
14.008	4.532		4.532	3.605
3.605	0.824		19.673	3.296
5.768	1.854		3.399	2.781
5.047	1.133		2.575	1.545
26.883	7.21		9.682	1.442
7.21	0.927		22.145	1.854
16.068	0.721		8.858	2.884
4.944	0.721		3.09	4.017
3.193	0.824		5.871	3.399
4.635	0.824		32.239	2.472
19.982	1.854		5.562	4.532
4.12	1.442		2.369	1.03
12.875	1.339		9.27	2.678
2.266	1.133		17.304	1.751
8.24	0.927		9.064	2.781
3.605	2.163		11.742	1.545
28.531	2.369		2.781	1.648
4.841	1.03		10.918	2.163
2.369	1.957		6.077	6.18
3.296	6.077		16.686	3.296
1.957	1.957		2.678	3.296
13.39	0.927		4.635	4.429
3.296	1.236		5.871	1.339
5.253	1.648		15.759	1.03
5.253	5.974		15.759	1.545
2.06	3.914		7.931	2.884
23.69	1.545		7.828	3.605
1.648	1.133		3.811	3.296
2.987	1.648		4.532	3.708
6.18	1.854		4.738	1.957
17.716	3.193		9.167	2.575
10.3	2.266		3.605	5.665
3.399	1.854		5.871	9.888
6.695	3.296		4.12	1.339
11.536	3.914		30.694	3.502
12.566	1.854		6.077	1.339
12.154	1.854		5.562	7.828
7.004	1.648		8.652	2.06
5.047	2.884		11.742	2.987
7.519	0.412		5.871	1.133
1.442	0.721		10.712	1.957
5.047	0.515		5.253	1.957
2.575	1.236		17.613	2.472
4.635	1.648		9.785	4.841
7.519	3.09		5.253	4.429
9.476	2.575		1.648	2.369
8.034	1.545		29.355	1.751
8.446	1.545		10.3	1.236
14.626	1.648		14.42	1.545
2.06	3.914		6.489	1.339
8.755	4.017		5.459	1.545
10.197	1.854		5.665	2.884
2.678	1.236		16.171	4.326
3.193	1.339		2.678	8.652
9.373	0.618		23.793	8.755
3.708	0.927		8.446	4.429
3.502	1.236		30.9	4.532
3.502	1.03		7.416	3.708
6.283	2.06		6.695	3.193
13.905	0.721		9.373	2.884
5.562	1.545		11.948	2.987
7.416	0.927		5.356	4.532
9.27	1.236		12.772	3.296
3.708	1.339		15.038	5.665
1.648	3.708		11.845	2.575
19.467	5.356		24.72	2.369
3.914	2.472		7.107	5.974
4.12	2.781		25.75	1.957
11.536	1.339		13.184	2.884
4.532	0.927		22.351	2.472
32.857	0.824		6.283	3.193
5.562	0.515		12.36	1.648
13.802	0.618		8.24	1.339
23.484	2.266		15.038	1.648
10.609	1.03		11.845	2.369
3.914	0.824		6.283	3.502
1.957	2.575		6.18	1.751
1.751	2.678		3.605	1.957
2.369	4.223		8.446	2.781
1.751	3.09		10.609	2.06
12.051	2.575		8.137	1.957
2.472	2.678		2.369	2.266
3.708	0.824		0.927	1.236
7.21	3.708		1.133	1.854
10.815	1.03		5.459	1.751
13.802	0.927		23.072	2.163
18.437	0.927		8.24	3.09
8.137	6.077		26.265	2.369
7.622	1.957		23.381	5.15
2.369	1.957		11.742	1.545
3.193	1.133		8.549	4.635
17.613	0.618		3.502	1.03
5.047	1.442		6.695	1.854
10.403	1.03		6.077	4.12
2.163	2.987		5.562	5.356
2.884	1.339		2.678	2.987
5.768	1.339		3.296	5.768
2.575	2.06		11.433	2.06
1.854	0.927		3.193	3.399
0.927	1.442		1.133	1.545
2.369	1.648		15.141	6.489
2.369	2.163		1.236	1.648
2.369	0.927		5.459	2.06
2.06	1.751		8.137	2.472
10.712	0.721		27.398	2.678
1.545	0.618		4.12	2.369
7.622	2.987		2.369	1.854
1.648	3.914		13.39	1.957
5.974	0.927		2.884	2.781
7.622	0.927		4.017	4.017
7.313	1.648		11.227	1.339
3.09	2.884		16.48	1.339
2.678	1.339		6.283	0.824
2.472	2.266		14.935	1.133
2.884	2.266		1.854	2.369
3.811	1.236		21.733	2.678
6.077	0.618		15.244	4.223
1.03	1.339		15.45	0.824
1.133	4.841		4.12	0.824
2.266	3.09		23.793	3.193
1.133	1.751		5.15	2.266
4.532	4.223		3.708	1.133
2.06	3.296		5.665	2.575
1.236	1.236		20.291	1.854
2.575	2.163		12.772	2.163
9.888	1.957		5.665	1.03
2.266	0.618		31.106	2.781
2.472	1.545		19.055	2.369
6.283	1.648		8.034	4.326
4.635	1.133		6.283	1.751
1.03	3.193		2.987	3.399
19.261	1.545		7.313	3.708
5.768	1.03		2.884	3.811
1.339	2.163		4.532	2.266
5.15	0.927		3.605	2.163
7.004	0.927		5.665	1.03
2.781	2.163		15.862	1.648
20.085	2.678		9.27	2.06
3.399	0.721		12.154	4.12
1.854	1.339		2.163	2.884
2.472	0.824		2.781	3.296
4.223	1.545		5.356	4.326
2.472	0.927		1.957	3.09
3.296	1.133		1.648	1.339
2.678	1.442		8.137	1.236
3.193	1.648			1.236
3.296	0.927			2.266
19.158	0.824			1.751
4.223	5.253			3.296
3.399	0.721			4.12
4.635	0.927			3.502
7.725	1.133			1.957
4.532	1.339			3.296
2.06	2.163			3.296
3.296	1.236			2.884
2.472	0.515			3.502
14.42	0.824			6.901
5.253	0.721			5.665
2.678	1.957			4.429
3.399	1.957			1.648
15.759	0.824			3.811
4.635	1.133			1.236
4.017	1.751			2.678
11.845	1.545			5.665
9.991	3.914			3.914
25.441	1.957			6.489
7.416	3.914			2.266
4.12	5.562			3.399
32.445	2.369			4.635
3.605	1.03			3.811
1.236	0.618			2.472
4.326	1.236			1.648
3.399	3.296			3.193
2.472	0.721			0.824
11.948	1.339			1.957
12.566	0.721			2.678
4.017	1.442			3.605
1.648	2.884			0.927
4.738	2.472			2.987
13.39	1.545			1.236
7.416	3.09			1.339
2.472	1.545			3.399
1.648	1.236			1.751
8.446	1.03			3.193
9.27	1.236			2.781
3.296	1.957			2.678
9.888	1.339			1.854
7.21	1.442			1.339
19.261	4.017			1.442
9.476	0.721			4.223
10.712	1.133			2.678
4.532	1.648			2.472
2.575	1.03			3.399
2.884	2.266			2.781
4.532	0.927			1.03
11.33	1.03			2.369
5.871	1.03			3.708
12.154	1.133			4.944
7.828	3.09			2.163
1.442	0.721			1.03
9.682	0.618			3.708
5.974	2.06			4.429
3.09	1.957			2.472
3.708	3.296			0.824
7.519	2.163			1.751
8.343	0.927			2.575
3.296	3.296			5.15
2.266	1.03			2.884
3.09	1.133			2.163
3.399	0.824			2.781
4.017	1.236			4.635
1.236	0.721			1.648
1.751	0.721			1.957
4.223	1.03			4.429
4.635	1.03			2.884
8.24	1.236			2.163
14.317	1.339			1.854
3.811	1.442			2.575
1.854	1.133			2.06
4.635	1.133			4.017
2.163	1.339			2.266
2.369	0.824			3.193
7.931	2.472			1.957
9.991	1.236			2.06
5.459	2.781			2.163
8.961	2.163			1.751
3.502	1.339			2.884
4.532	2.266			1.854
1.339	1.751			2.678
2.987	0.927			0.824
3.296	2.575			2.884
2.06	1.03			1.236
1.442	2.575			2.781
2.369	1.545			2.06
1.751	1.03			2.266
1.751	1.648			1.236
2.06	1.648
2.472	3.399
0.927	0.927
1.133	1.648
7.21	1.236
6.489	0.824
2.884	1.339
4.532	2.472
1.03	1.03
7.931	1.545
1.03	1.957
2.06	0.515
3.605	0.927
4.944	2.163
3.09	3.502
8.549	0.721
7.107	0.824
1.751	1.442
4.532	2.369
10.815	2.06
2.781	1.751
1.648	2.884
1.957	2.472
2.163	1.236
4.944	0.721
4.223	2.884
5.665	0.927
1.236	0.515
10.197	1.442
1.236	1.648
3.708	1.03
7.004	0.927
3.708	6.592
19.982	3.09
3.914	1.957
1.545	4.944
5.047	2.163
9.476	2.163
1.854	1.339
2.266	1.133
6.386	1.03
2.678	0.721
0.927	0.618
1.957	3.296
2.06	1.545
6.798	1.648
13.905	2.987
2.163	1.339
1.957	1.03
5.768	1.236
10.403	1.751
2.575	2.781
9.476	2.06
4.12	1.648
13.802	2.369
14.626	2.266
12.669	1.236
4.017	1.133
19.57	1.545
6.18	0.824
7.622	2.575
3.708	1.236
2.575	2.781
1.648	1.03
18.334	2.163
1.751	0.515
26.574	0.927
3.296	1.442
1.751	0.515
2.987	1.545
8.961	2.369
3.605	1.339
3.811	7.519
2.781	1.751
6.798	2.575
15.45	4.12
1.957	3.193
6.901	2.987
41.303	3.708
26.986	1.545
27.604	2.781
31.312	4.429
8.652	2.987
4.532	1.03
8.24	1.236
2.678	3.502
7.313	1.957
5.253	1.236
5.871	5.974
6.901	2.678
4.944	2.678
6.283	2.163
2.987	2.781
3.09	2.575
3.605	2.678
3.605	4.017
4.944	3.914
26.78	3.502
7.107	6.489
5.562	8.549
2.369	4.017
1.854	2.678
3.09	1.339
10.506	2.163
3.193	2.369
4.429	1.957
6.489	2.472
9.991	2.06
1.648	1.957
1.957	2.06
2.369	2.678
5.15	2.987
9.785	1.854
12.875	2.06
14.008	1.545
19.776	1.854
5.253	2.266
2.266	3.708
1.236	1.854
1.442	2.472
4.738	1.133
4.429	2.06
6.695	3.296
12.875	2.472
6.283	1.957
5.356	0.824
16.274	1.236
12.463	1.236
6.798	2.163
5.871	2.06
13.802	1.03
9.579	1.03
4.738	1.442
5.047	0.927
2.678	1.648
9.785	2.781
8.137	1.339
9.167	2.266
3.193	1.236
2.472	1.442
3.502	0.927
2.369	2.266
20.085	1.339
1.648	2.472
4.532	3.296
1.339	1.339
4.12	0.721
9.579	1.133
6.695	1.751
3.605	1.545
3.708	1.957
3.296	2.369
1.339	0.927
19.879	0.824
23.072	2.781
5.253	2.472
3.914	6.592
2.06	4.429
14.317	1.545
28.943	3.502
2.472	2.06
2.369	3.193
18.952	4.429
2.884	2.575
5.15	4.841
4.12	4.429
2.987	5.15
5.253	3.193
6.798	2.369
3.09	2.884
2.678	1.957
7.622	2.266
3.811	1.339
4.532	4.326
2.266	0.927
8.24	1.133
2.987	1.545
3.605	0.721
2.163	4.326
1.854	1.236
5.768	1.854
9.888	1.854
1.751	1.236
3.502	2.472
1.648	1.545
5.562	2.369
2.884	1.545
2.678	1.545
5.356	2.06
7.931	4.532
3.193	1.751
4.017	1.339
1.339	2.987
4.326	1.133
9.064	3.502
14.111	2.472
2.472	2.369
4.944	1.648
14.523	3.193
4.12	1.957
3.811	2.06
1.648	1.957
1.442	1.133
4.326	4.12
7.21	2.678
3.399	1.854
3.09	3.811
1.751	3.708
3.193	2.266
1.339	2.163
1.339	5.356
8.446	3.399
8.755	4.532
2.678	1.854
2.987	2.575
10.197	1.751
2.369	2.369
12.36	1.957
3.193	1.854
3.399	2.06
19.467	1.442
7.107	4.429
7.416	1.854
2.06	1.854
1.957	1.648
2.369	1.854
2.163	1.133
2.678	3.296
2.06	2.678
10.609	1.133
2.472	1.545
3.296	0.824
10.609	1.854
6.489	4.017
8.343	2.369
1.648	4.017
1.03	1.03
2.575	1.03
2.781	2.472
3.914	2.163
3.811	2.472
2.163	2.369
14.935	3.09
4.12	2.781
5.459	1.339
6.592	1.442
4.223	1.339
2.575	1.339
2.987	3.09
1.442	3.193
2.575	3.502
1.545
5.665
5.562
21.939
8.034
2.987
1.854
4.017
3.09
2.163
23.278
1.236
16.171
56.856
17.201
4.635
6.077
5.768
2.06
3.502
1.957
4.326
3.708
1.854
2.369
9.476
3.09
4.326
2.781
8.24
5.665
2.575
4.944
4.944
9.27
5.15
2.781
2.369
3.09
2.781
5.768
1.751
1.442
1.03
3.708
2.06
2.163
7.519
2.06
2.369
4.326
3.09
2.575
2.06
18.54
11.124
8.24
1.751
2.266
4.12
1.854
3.708
4.841
1.957
3.811
3.708
1.751
2.678
2.369
4.223
1.442
1.751
1.339
3.399
1.545
0.721
1.854
1.854
5.047
2.369
1.854
2.06
6.489
2.369
7.313
2.472
2.472
2.369
1.442
4.841
8.652
4.223
5.356
6.077
1.854
10.815
5.253
1.442
1.751
8.652
4.841
1.648
4.635
4.429
11.33
9.167
3.914
2.781
3.811
7.416
5.15
1.648
3.193
2.884
2.472
2.678
1.751
1.339
1.854
2.369
1.442
2.266
1.339
1.957
1.236
1.339
1.236
1.545
3.296
1.545
2.266
1.545
3.193
1.236
5.253
8.137
10.094
2.575
7.416
1.648
7.004
7.828
3.399
7.725
7.107
9.373
2.369
1.854
5.047
4.532
7.622
4.326
8.961
2.266
3.193
2.575
3.708
7.622
2.678
8.446
2.472
1.236
4.944
5.253
12.36
1.339
6.695
4.326
3.296
1.648
2.678
9.785
3.708
2.06
1.545
8.137
2.266
5.562
2.987
3.296
6.695
1.133
1.957
12.36
2.06
2.781
1.648
13.699
4.223
3.399
4.635
5.665
4.12
3.502
3.296
3.09
1.236
7.313
2.884
2.06
2.575
4.429
4.738
2.884
3.914
3.193
1.339
16.789
14.729
5.871
6.695
2.369
0.927
1.339
1.03
2.884
2.369
1.648
2.781
1.03
3.296
0.927
12.669
3.914
3.399
2.472
1.545
1.545
1.442
3.811
1.854
8.343
1.854
1.236
2.266
6.695
2.781
2.781
12.051
2.781
4.12
1.648
0.927
5.15
1.339
9.167
2.369
2.369
1.339
1.133
1.545
4.841
12.978
1.957
3.811
1.545
0.721
0.618
8.755
3.502
0.721
5.768
6.386
1.236
4.635
8.755
1.648
1.545
1.03
4.12
1.339
3.708
1.442
7.828
3.502
3.296
1.545
2.575
5.562
3.09
1.751
19.982
1.751
0.824
2.678
5.15
4.326
13.802
4.429
10.712
0.721
0.721
2.06
0.721
1.751
2.369
2.678
0.927
1.339
1.133
1.339
1.648
0.927
1.236
1.854
3.193
2.06
3.09
1.442
0.721
2.369
1.442
1.133
1.03
0.721
2.678
1.339
1.133
3.399
0.721
0.618
0.721
1.339
4.738
6.592
1.133
2.781
3.09
3.399
4.429
1.339
2.575
1.751
1.545
1.133
1.236
7.107
1.339
2.06
3.193
2.575
1.236
1.854
4.944
3.09
0.927
5.356
1.648
2.678
2.06
2.06
1.03
3.296
1.648
0.927
3.296
1.133
0.721
1.751
1.442
1.648
2.575
8.961
1.442
4.12
10.094
8.961
3.708
2.369
10.815
3.193
3.193
11.021
5.562
22.557
14.626
15.965
12.978
3.399
12.566
6.592
2.472
1.442
1.545
1.854
3.811
2.266
2.163
11.021
0.618
1.133
6.077
1.854
1.751
1.133
1.957
2.884
22.042
3.605
2.884
1.236
2.06
1.545
2.472
2.163
1.236
3.296
1.957
15.347
3.09
1.957
2.575
0.927
0.824
0.721
1.957
7.416
7.828
4.635
9.064
9.167
1.442
3.193
6.283
2.472
9.579
0.927
23.999
8.034
6.283
3.09
3.708
4.326
7.931
3.09
8.343
17.922
4.326
2.266
1.442
6.798
7.107
4.326
4.223
14.935
7.931
5.459
9.682
2.678
3.605
3.09
2.266
1.854
2.987
4.326
9.373
4.429
3.605
3.502
4.532
1.442
7.519
5.562
9.476
19.879
5.871
12.566
2.266
2.678
2.575
1.957
2.06
6.798
1.751
0.927
9.064
5.871
10.403
4.738
4.12
6.18
7.828
2.06
2.678
5.974
5.974
2.163
1.854
1.03
25.441
16.171
11.639
15.45
4.841
2.06
1.133
2.678
11.021
13.699
22.145
17.819
6.386
15.553
14.317
8.034
4.635
2.06
4.635
5.665
4.326
7.21
6.695
7.107
4.326
16.068
1.442
3.502
4.429
3.193
1.854
3.605
