# Supplementary material for: Activation of the CaMKII-Sarm1-ASK1-p38 MAP kinase pathway protects against axon degeneration caused by loss of mitochondria
Source: eLife. 2022 Mar 14;11:e73557. doi: 10.7554/eLife.73557 (PMC8920508; doi:10.7554/eLife.73557)
Supplement: Figure 4—source data 1. [file elife-73557-fig4-data1.xlsx]

## Sheet: Figure 4A
Genotype	Animals with two intact axons	Animals with degeneration	Total number of animals	Fraction of animals with two intact axons
ric-7(n2657); casy-1(wp60)	95	5	100	0.95
ric-7(n2657); casy-1(wp60) +PVQ:casy-1c	11	103	114	0.0964912
ric-7(n2657); casy-1(wp60) +PVQ:casy-1c mutated acidic residues	28	60	88	0.318182
ric-7(n2657); casy-1(wp60) +PVQ:casy-1c WWAA	107	11	118	0.90678

## Sheet: 4B
Genotype	Animals with two intact axons	Animals with degeneration	Total number of animals	Fraction of animals with two intact axons
ric-7(n2657)	0	22	22	0
ric-7(n2657), klc-2(km11)	24	3	27	0.888889
ric-7(n2657); klc-1(ok2609)	0	20	20	0

## Sheet: 4C
Genotype	Animals with two intact axons	Animals with degeneration	Total number of animals	Fraction of animals with two intact axons
ric-7(n2657)	0	50	50	0
ric-7(n2657); lin-10(n1853)	32	16	48	0.666667
ric-7(n2657); lin-10(e1439)	28	10	38	0.736842

## Sheet: 4E-4F
Normalized CASY-1 intensity
Cell body				Distal axon
WT	klc-2(km11)	ric-7(n2657)		WT	klc-2(km11)	ric-7(n2657)
0.563179	0.379362	0.805182		0.919099	0.023896	0.939248
0.627922	0.44281	0.570604		0.946174	0.156505	0.580903
1.2529	0.369147	0.865529		0.790394	0.093443	1.29029
1.34959	0.260266	1.31554		1.52292	0.061235	0.546617
0.723386	0.417281	0.930156		0.705766	0.06196	0.956942
1.26115	0.317666	1.22949		1.34025	0.077387	0.52546
1.23958	0.336519	0.585903		1.41471	0.195922	0.95096
1.46731	0.42786	0.625392		0.594535		1.19351
1.27853		0.776343		0.574008		1.32281
0.55617		0.8375		0.844609		0.584523
0.703003		1.23701		0.81536		0.691567
1.22768		0.626647		1.27785		1.24983
1.01643		1.04625		0.584869		0.680611
0.67163		1.55765		1.66945
1.06153		0.969359
		0.774325
		0.831292

## Sheet: 4H
Number of CASY-1 puncta
wt	klc-2
0	14
1	17
2	14
6	14
1	15
3	13
2	15
6	21
4	18
1	8
6	7
1	13
4	23
4	17
2	18
	19
	18
	13

## Sheet: 4J-K
Normalized LIN-10 intensity
Cell body			Distal axon
WT	casy-1(wp78)		WT	casy-1(wp78)
1.19758	0.546439		1.10942	0.408603
0.922199	0.928118		0.839778	0.952025
1.87423	0.861161		1.40345	0.398233
1.28289	1.18939		2.70686	0.287084
1.07904	1.11988		0.492422	0.636757
0.643858	1.32583		0.662745	0.290134
0.506599	0.661519		0.503769	0.319538
1.52287	1.04339		1.15053	0.214367
0.94503	0.797375		0.71106	0.275493
0.894428	2.15895		1.52156	1.30939
0.843076	1.53367		1.79924	0.656645
0.886779	0.975972		0.799881	0.435079
0.752154	1.74062		0.415314	0.42788
0.694479	0.578111		0.94446	0.448744
1.31745	1.42009		0.715452	0.462409
1.4405	0.869482		1.07123	0.580512
0.923813	1.13602		0.5433	0.804396
0.689444	2.14528		1.0949	0.337595
0.665363	0.996959		0.58527	0.183743
0.662154	1.9392		0.83563	0.280983
0.700514	1.03574		0.57795	0.376515
0.728361	1.12286		0.735706	0.598569
1.12666	1.32054		1.74861	0.837704
1.09084	1.65982		0.81623	0.282203
1.49476	0.799777		1.73202	0.26012
0.456055	1.29258		0.67702	0.10395
1.16431	0.701263		0.882603	0.056123
1.49456	0.512711		0.923597	0.395792
0.450776	1.41683		0.799376	0.631389
0.520207	1.20496		0.850722	0.60662
1.14278	1.64118		0.846195	0.67393
0.965864	1.18844		0.944956	0.819629
0.91351	1.33232		0.796755	0.654988
0.632519	1.7118		0.709789	1.1912
1.07129	2.05574		0.659873	0.428518
0.765776	1.6178		0.990583	0.838332
1.36276	1.04448		1.09101	0.557538
0.966026	0.941231		0.998684	0.673573
1.60763	1.91774		0.971879	0.662136
1.69209	1.45802		0.638786	0.228614
0.522059	1.27477		0.871928	0.707764
0.635411	1.12678		1.00393	0.789965
0.863561	1.66674		1.08923	0.322133
1.12694	0.894207		0.687035	0.731828
0.855989	0.900267		1.26542	0.946623
1.26177	1.82426		1.21276	0.738142
1.12205	2.09908		1.20943	0.719915
1.33379	1.69157		1.99368	0.550152
1.31461	1.86436		1.42875	0.244936
1.03812	1.67506		0.939237	0.676551
0.834476	0.767206			1.83297
	0.843494			0.673573
	1.27987
	1.10146
	0.932635
