# Supplementary material for: Activation of the CaMKII-Sarm1-ASK1-p38 MAP kinase pathway protects against axon degeneration caused by loss of mitochondria
Source: eLife. 2022 Mar 14;11:e73557. doi: 10.7554/eLife.73557 (PMC8920508; doi:10.7554/eLife.73557)
Supplement: Figure 5—figure supplement 1—source data 2. [file elife-73557-fig5-figsupp1-data2.xlsx]

## Sheet: Figure 5-figure supplement 1C
Genotype	Animals with two intact axons	Animals with degeneration	Total number of animals	Fraction of animals with two intact axons
ric-7(n2657)	0	50	50	0
ric-7(n2657); apl-1(wp19) + PVQ::Cre	10	81	91	0.10989
ric-7(n2657) + PVQ::Cre	10	109	119	0.0840336
ric-7(n2657); apl-1(wp22)	0	33	33	0
