# Supplementary material for: Activation of the CaMKII-Sarm1-ASK1-p38 MAP kinase pathway protects against axon degeneration caused by loss of mitochondria
Source: eLife. 2022 Mar 14;11:e73557. doi: 10.7554/eLife.73557 (PMC8920508; doi:10.7554/eLife.73557)
Supplement: Figure 5—figure supplement 2—source data 1. [file elife-73557-fig5-figsupp2-data1.xlsx]

## Sheet: Figure 5-figure supplement 2
Genotype	Animals with two intact axons	Animals with degeneration	Total number of animals	Fraction of animals with two intact axons
ric-7(n2657)	0	25	25	0
ric-7(n2657); lin-2(e1309)	0	32	32	0
