# Supplementary material for: Activation of the CaMKII-Sarm1-ASK1-p38 MAP kinase pathway protects against axon degeneration caused by loss of mitochondria
Source: eLife. 2022 Mar 14;11:e73557. doi: 10.7554/eLife.73557 (PMC8920508; doi:10.7554/eLife.73557)
Supplement: Figure 5—source data 1. [file elife-73557-fig5-data1.xlsx]

## Sheet: Figure 5A
Genotype	Age	Animals with two intact axons	Animals with degeneration	Total number of animals	Fraction of animals with two intact axons
ric-7(n2657); casy-1(wp78); unc-43(e408)	L4	48	2	50	0.96
	1doa	32	16	48	0.666667
	2doa	8	69	77	0.103896
	3doa	2	52	54	0.037037
	4doa	2	51	53	0.0377358
	5doa	2	52	54	0.037037
ric-7(n2657)	L4	50	8	58	0.862069
	1doa	0	49	49	0
	2doa	0	50	50	0
	3doa	0	54	54	0
	4doa	0	57	57	0
	5doa	0	56	56	0
ric-7; casy-1(wp78)	L4	53	0	53	1
	1doa	57	6	63	0.904762
	2doa	59	7	66	0.893939
	3doa	52	9	61	0.852459
	4doa	43	9	52	0.826923
	5doa	37	8	45	0.822222

## Sheet: Figure 5B
Genotype	Age	Animals with two intact axons	Animals with degeneration	Total number of animals	Fraction of animals with two intact axons
ric-7(n2657); lin-10(n1853); unc-43(e408)	L4	50	2	52	0.961538
	1doa	31	27	58	0.534483
	2doa	5	44	49	0.102041
	3doa	2	36	38	0.0526316
	4doa	2	43	45	0.0444444
	5doa	3	47	50	0.06
ric-7(n2657)	L4	48	5	53	0.90566
	1doa	0	51	51	0
	2doa	0	53	53	0
	3doa	0	54	54	0
	4doa	0	43	43	0
	5doa	0	46	46	0
ric-7(n2657); lin-10(n1853)	L4	73	2	75	0.973333
	1doa	58	13	71	0.816901
	2doa	37	10	47	0.787234
	3doa	44	11	55	0.8
	4doa	30	7	37	0.810811
	5doa	22	11	33	0.666667

## Sheet: Figure 5C
Genotype	Age	Animals with two intact axons	Animals with degeneration	Total number of animals	Fraction of animals with two intact axons
ric-7(n2657); klc-2(km11); unc-43(e408)	L4	53	0	53	1
	1doa	29	23	52	0.557692
	2doa	1	51	52	0.0192308
	3doa	6	44	50	0.12
	4doa	4	38	42	0.0952381
	5doa	7	53	60	0.116667
ric-7(n2657)	L4	51	8	59	0.864407
	1doa	0	58	58	0
	2doa	0	57	57	0
	3doa	0	50	50	0
	4doa	0	51	51	0
	5doa	0	56	56	0
ric-7(n2657); klc-2(km11)	L4	57	0	57	1
	1doa	51	2	53	0.962264
	2doa	54	1	55	0.981818
	3doa	46	4	50	0.92
	4doa	36	6	42	0.857143
	5doa	41	7	48	0.854167

## Sheet: 5D
Genotype	Animals with two intact axons	Animals with degeneration	Total number of animals	Fraction of animals with two intact axons
ric-7(n2657); casy-1(wp78)	34	19	53	0.641509
ric-7(n2657); casy-1(wp78); unc-43(e408)	3	58	61	0.0491803
ric-7(n2657); casy-1(wp78); unc-43(e408) + PVQ::unc-43g WT	29	17	46	0.630435
ric-7(n2657); casy-1(wp78); unc-43(e408) + PVQ::unc-43g T286D	47	8	55	0.854545

## Sheet: 5E
Genotype	Animals with two intact axons	Animals with degeneration	Total number of animals	Fraction of animals with two intact axons
ric-7; casy-1(wp78)	54	7	61	0.885246
ric-7; casy-1(wp78); tir-1(qd4)	8	28	36	0.222222
ric-7; casy-1(wp78); nsy-1(ok594)	19	25	44	0.431818
ric-7; casy-1(wp78); sek-1(km4)	3	26	29	0.103448
ric-7; casy-1(wp78); pmk-1(km25)	33	6	39	0.846154
ric-7; casy-1(wp78); pmk-1(km25), pmk-2(qd279qd171)	32	8	40	0.8
ric-7; casy-1(wp78); pmk-3(ok169)	0	33	33	0
ric-7; casy-1(wp78); cebp-1(tm2807)	0	37	37	0
