# Supplementary material for: Activation of the CaMKII-Sarm1-ASK1-p38 MAP kinase pathway protects against axon degeneration caused by loss of mitochondria
Source: eLife. 2022 Mar 14;11:e73557. doi: 10.7554/eLife.73557 (PMC8920508; doi:10.7554/eLife.73557)
Supplement: Figure 6—figure supplement 1—source data 1. [file elife-73557-fig6-figsupp1-data1.xlsx]

## Sheet: Figure 6-figure supplement 1B
Normalized UNC-43 intensity in distal axon
Control	ric-7(n2657)	ric-7(n2657); casy-1(wp78)	ric-7(n2657); lin-10(e1853)
0.991179	0.137529	0.132118	0.299302
0.548132	0.241511	0.225581	0.592362
0.943411	0.277957	0.223149	0.274014
0.716883	0.1857	0.305579	0.238611
0.574243	0.132736	0.386831	0.655228
1.02453	0.105874	0.341571	0.7428
1.08185	0.195232	0.102858	0.4363
1.01153	0.275234	0.413301	0.610346
1.17772	0.577153	0.237843	0.382205
1.51489	0.462985	0.360643	0.138979
0.347818	0.85092	0.156335	0.236135
1.32597	0.73997	0.222099	0.575792
1.10689	0.34811	0.270201	0.46723
0.667425	0.140075	0.21849	0.541803
1.07369	0.350321	0.191124	0.612964
1.11306	0.504967	0.29987	0.80029
1.6233	0.136096	0.287019	0.595934
0.958079	0.27626	0.045644	0.264535
1.21046	0.402577	0.150703	0.407776
1.37158	0.094822	0.332791	0.520069
0.735032	0.311097	0.451239	0.473861
1.26921	0.237709	0.181781	0.19578
0.522686		0.434958	0.278965
1.09043		0.343158	0.141083
0.784693		0.201031	0.256065
1.08387		0.551511	0.420561
0.941957			0.335749
0.819584
0.953487
1.71915
0.846074
0.455983
0.852087
1.09736
0.760395
0.340099
1.29932
1.97746
1.26181
1.25153
1.13187
0.664513
0.947227
1.18106
1.05425
0.375927
1.20029
