# Supplementary material for: Activation of the CaMKII-Sarm1-ASK1-p38 MAP kinase pathway protects against axon degeneration caused by loss of mitochondria
Source: eLife. 2022 Mar 14;11:e73557. doi: 10.7554/eLife.73557 (PMC8920508; doi:10.7554/eLife.73557)
Supplement: Figure 6—figure supplement 2—source data 1. [file elife-73557-fig6-figsupp2-data1.xlsx]

## Sheet: Figure 6-figure supplement 2A
Genotype	Age	Animals with two intact axons	Animals with degeneration	Total number of animals	Fraction of animals with two intact axons
ric-7(n2657); casy-1(wp78)	1doa	22	0	22	1
	2doa	19	2	21	0.904762
	3doa	33	4	37	0.891892
	4doa	28	4	32	0.875
ric-7(n2657); casy-1(wp78); unc-2(e55)	1doa	12	0	12	1
	2doa	40	1	41	0.97561
	3doa	36	0	36	1
	4doa	13	0	13	1

## Sheet: Figure 6-figure supplement 2B
Genotype	Age	Animals with two intact axons	Animals with degeneration	Total number of animals	Fraction of animals with two intact axons
ric-7(n2657); lin-10(n1853)	L4	43	0	43	1
	1doa	32	9	41	0.780488
	2doa	20	7	27	0.740741
	3doa	15	6	21	0.714286
ric-7(n2657); lin-10(n1853); unc-2(e55)	L4	36	1	37	0.972973
	1doa	17	34	51	0.333333
	2doa	2	29	31	0.0645161
	3doa	3	25	28	0.107143

## Sheet: Figure 6-figure supplement 2C
Genotype	Animals with two intact axons	Animals with degeneration	Total number of animals	Fraction of animals with two intact axons
Control	52	0	52	1
unc-43(e408)	69	0	69	1
egl-19(n582)	48	1	49	0.979592
unc-36(e251)	52	0	52	1
