# Supplementary material for: Activation of the CaMKII-Sarm1-ASK1-p38 MAP kinase pathway protects against axon degeneration caused by loss of mitochondria
Source: eLife. 2022 Mar 14;11:e73557. doi: 10.7554/eLife.73557 (PMC8920508; doi:10.7554/eLife.73557)
Supplement: Figure 6—source data 1. [file elife-73557-fig6-data1.xlsx]

## Sheet: Figure 6A
Genotype	Age	Animals with two intact axons	Animals with degeneration	Total number of animals	Fraction of animals with two intact axons
ric-7(n2657); casy-1(wp78)	L4	39	3	42	0.928571
	1doa	33	1	34	0.970588
	2doa	34	7	41	0.829268
	3doa	34	2	36	0.944444
ric-7(n2657); casy-1(wp78); egl-19(n582)	L4	33	5	38	0.868421
	1doa	5	38	43	0.116279
	2doa	2	33	35	0.0571429
	3doa	1	36	37	0.027027

## Sheet: Figure 6B
Genotype	Age	Animals with two intact axons	Animals with degeneration	Total number of animals	Fraction of animals with two intact axons
ric-7(n2657); casy-1(wp78)	L4	36	0	36	1
	1doa	34	8	42	0.809524
	2doa	34	6	40	0.85
	3doa	44	7	51	0.862745
ric-7(n2657); casy-1(wp78); unc-36(e251)	L4	36	3	39	0.923077
	1doa	8	36	44	0.181818
	2doa	5	48	53	0.0943396
	3doa	8	37	45	0.177778

## Sheet: Figure 6C
Genotype	Age	Animals with two intact axons	Animals with degeneration	Total number of animals	Fraction of animals with two intact axons
ric-7(n2657); lin-10(n1853)	L4	40	1	41	0.97561
	1doa	30	6	36	0.833333
	2doa	26	9	35	0.742857
	3doa	19	8	27	0.703704
ric-7(n2657); lin-10(n1853); egl-19(n582)	L4	17	22	39	0.435897
	1doa	2	32	34	0.0588235
	2doa	0	32	32	0
	3doa	0	23	23	0

## Sheet: Figure 6D
Genotype	Age	Animals with two intact axons	Animals with degeneration	Total number of animals	Fraction of animals with two intact axons
ric-7(n2657); lin-10(n1853)	L4	33	1	34	0.970588
	1doa	34	24	58	0.586207
	2doa	26	9	35	0.742857
	3doa	25	11	36	0.694444
ric-7(n2657); lin-10(n1853); unc-36(e251)	L4	29	5	34	0.852941
	1doa	2	33	35	0.0571429
	2doa	1	29	30	0.0333333
	3doa	0	39	39	0

## Sheet: Figure 6E
Genotype	Animals with two intact axons	Animals with degeneration	Total number of animals	Fraction of animals with two intact axons
ric-7(n2657); unc-43(n498sd)	29	5	34	0.852941
ric-7(n2657); unc-43(n498sd); unc-36(e251)	18	4	22	0.818182
